1 **The Gene Expression Profile of Uropathogenic *Escherichia coli* in Women with**  
2 **Uncomplicated Urinary Tract Infections Is Recapitulated in the Mouse Model**

3

4 Arwen E. Frick-Cheng<sup>1\*</sup>, Anna Sintsova<sup>1,2\*</sup>, Sara N. Smith<sup>1</sup>, Michael Krauthammer<sup>2</sup>, Kathryn A.  
5 Eaton<sup>1</sup> and Harry L. T. Mobley<sup>1</sup>

6

7 <sup>1</sup> Department of Microbiology and Immunology, University of Michigan, Ann Arbor, USA

8 <sup>2</sup> Department of Quantitative Biomedicine, University of Zurich, Zurich, Switzerland

9

10

11 \* Authors contributed equally

12 Correspondence should be addressed to Harry L. T. Mobley (hmobley@med.umich.edu)

13

14 Keywords: UPEC, transcriptome, human infection, mouse model of UTIs

15

## 16 **Abstract**

17 Uropathogenic *Escherichia coli* (UPEC) is the primary causative agent of uncomplicated  
18 urinary tract infections (UTIs). UPEC fitness and virulence determinants have been evaluated in a  
19 variety of laboratory settings that include a well-established mouse model of UTI. However, the  
20 extent to which bacterial physiology differs between experimental models and human infections  
21 remains largely understudied. To address this important question, we compared the transcriptomes  
22 of three different UPEC isolates in human infection and a variety of laboratory conditions  
23 including LB culture, filter-sterilized urine culture, and the UTI mouse model. We observed high  
24 correlation in gene expression between the mouse model and human infection in all three strains  
25 examined (Pearson correlation coefficient of 0.86-0.87). Only 175 of 3,266 (5.4%) genes shared  
26 by all three strains had significantly different expression levels, with the majority of them (145  
27 genes) down-regulated in patients. Importantly, gene expression of both canonical virulence  
28 factors and metabolic machinery were highly similar between the mouse model and human  
29 infection, while the *in vitro* conditions displayed more substantial differences. Interestingly,  
30 comparison of gene expression between the mouse model and human infection hint at differences  
31 in bladder oxygenation as well as nutrient composition. In summary, our work strongly validates  
32 the continued use of this mouse model for the study of the pathogenesis of human UTI.

33

## 34 **Importance**

35 Different experimental models have been used to study UPEC pathogenesis including *in vitro*  
36 cultures in different media, tissue culture, as well as mouse models of infection. The latter is  
37 especially important since it allows evaluation of mechanisms of pathogenesis and potential  
38 therapeutic strategies against UPEC. Bacterial physiology is greatly shaped by environment and it

39 is therefore critical to understand how closely bacterial physiology in any experimental model  
40 relates to human infection. In this study, we found a very strong correlation in bacterial gene  
41 expression between the mouse model and human UTI using identical strains, suggesting that the  
42 mouse model accurately mimics human infection, definitively supporting its continued use in UTI  
43 research.  
44

## 45 **Introduction**

46           Urinary tract infections (UTIs) are one of the most common bacterial infections in  
47 otherwise healthy individuals. Over 50% of women will experience at least one UTI in their  
48 lifetime, and half of these women will experience a recurrent infection within a year (1, 2). These  
49 infections affect 150 million people per year and result in annual medical costs of \$3.5 billion in  
50 the US alone (3). Uropathogenic *Escherichia coli* (UPEC) is responsible for 80% of uncomplicated  
51 UTIs (1) and deploy diverse strategies to survive and replicate in the human host. These comprise  
52 an array of virulence factors including, but not limited to, iron acquisition systems (siderophores  
53 and heme receptors), fimbriae and other adhesins, flagella, and toxins (4-7). The importance of  
54 these systems to bacterial fitness has been studied in detail using multiple models including  
55 cultures in laboratory media, human urine cultures, tissue culture, and a mouse model first  
56 established over 30 years ago (8). However, animal models can fail to recapitulate important  
57 aspects of the human response to disease (9). Whether the mouse model accurately reflects the  
58 native environment found during human infection has not been adequately addressed. Therefore,  
59 it is vitally important to determine if the mouse model of ascending UTI recapitulates human UTI  
60 since defining mechanisms of pathogenesis and the development of UTI therapies relies on this  
61 assumption (10).

62           Previous studies compared the mouse model to human UTIs using microarrays to assess  
63 differences in bacterial gene expression (11, 12). Initially, urine from mice infected with UPEC  
64 type strain CFT073 was collected over a period of ten days, pooled and analyzed using a  
65 microarray based on the CFT073 genome (11). In a follow-up study, urine was collected from  
66 eight women with complicated UTIs and bacterial gene expression in the human host was  
67 analyzed, again using microarrays based on the CFT073 genome (12). Relative expression levels

68 of 46 fitness genes were compared between the mouse model and human UTI. This comparison  
69 demonstrated a Pearson's correlation coefficient of 0.59 and was strongest for iron acquisition  
70 systems and weakest for adhesin and motility systems (12). While encouraging, this study did not  
71 provide conclusive evidence that the mouse model closely replicated human UTI. A key weakness  
72 of our previous comparison was that genetic differences between currently circulating isolates and  
73 strain CFT073 used for the mouse infections would obscure strain-specific responses, either due  
74 to differences in mouse *versus* human UTI or because the CFT073-specific microarrays would not  
75 detect expression of genes that are not encoded by that strain.

76 We have recently used RNA sequencing (RNA-seq) to quantify the UPEC transcriptome  
77 during acute infection in 14 female patients (13). Importantly, RNA-seq is a more comprehensive  
78 platform to analyze the transcriptome of clinical UPEC strains since, unlike microarrays, it is not  
79 limited by strain-specific probes. In this study, we report the transcriptome during murine UTI for  
80 three of the 14 clinical strains using RNA-seq and directly compare the gene expression patterns  
81 for these identical strains between human UTI and the mouse model. We observed a high  
82 correlation between human infection and mouse infection (Pearson correlation coefficient ranging  
83 from 0.86-0.87) with only 175 of 3,266 shared genes being differentially expressed. Gene  
84 expression of classical virulence factors as well as metabolic genes in the mouse model closely  
85 resembled that observed during human UTI. Our study is the first of its kind to directly compare  
86 the bacterial transcriptomes between human and mouse UTI using identical strains. We conclude  
87 that the mouse model accurately reflects bacterial gene expression observed during human  
88 infection.

89

## 90 **Results**

91 **Study Design.** We previously sequenced the transcriptomes of 14 UPEC strains isolated directly  
92 from the urine of patients with uncomplicated UTIs (hUTI) and immediately stabilized with  
93 RNAprotect (13). Three out of 14 strains (HM43, HM56, and HM86) were chosen to conduct  
94 transcriptomic studies in the prevailing mouse model of UTI (mUTI) (8). We selected strains  
95 whose hUTI transcriptomes had the highest proportion of bacterial reads to eukaryotic reads  
96 (**Supplemental Table 1**) and that possessed a prototypical UPEC virulence factor profile. All three  
97 strains belong to the B2 phylogroup (13), where the majority of UPEC strains reside, and encode  
98 a range of siderophores, heme receptors, as well as multiple fimbrial types (**Fig. 1**).

99 To compare UPEC gene expression during mUTI against hUTI, 40 mice were  
100 transurethrally inoculated with each UPEC strain and mouse urine was collected directly into  
101 RNAprotect, 48 hours post inoculation, for RNA isolation and sequencing. Animals were then  
102 sacrificed and the bacterial burden of their urine, bladder and kidneys was quantified. All three  
103 strains successfully colonized the animals with bacterial burdens ranging between  $5.0 \times 10^3 - 4.4$   
104  $\times 10^4$  CFU/g in the bladder and  $1 \times 10^4 - 1.2 \times 10^6$  CFU/g in the kidneys (**Fig. 2A**), levels of  
105 colonization that are consistent with an active UTI. We also assessed levels of inflammation (on a  
106 scale from 0 to 3) in the bladders and kidneys of these infected mice, comparing them to mice that  
107 were mock-infected with PBS (**Fig. 2B, Supplemental Fig.1**). After 48 hours, infection with all  
108 of the three UPEC strains resulted in mild levels of inflammation in the bladder (median  
109 inflammation scores of 1.0, 0.25, and 0.5 for HM43, HM56 and HM86, respectively) and slightly  
110 higher levels in the kidneys (median inflammation scores of 1.25, 1.5, and 1.0 for HM43, HM56  
111 and HM86, respectively). These similar scores indicated that the general host responses were  
112 comparable across these three different strains.

113 In addition to isolating RNA from mouse urine during mUTI, we also isolated and  
114 sequenced RNA from HM43, HM56 and HM86 cultured to mid-logarithmic phase in both filter-  
115 sterilized human urine and lysogeny broth (LB). All samples processed in this study underwent  
116 identical treatments to deplete eukaryotic mRNA, prepare libraries, and conduct sequencing (see  
117 Methods).

118 **The bacterial transcriptome is highly correlated between human and mouse infections.** First,  
119 we assessed how UPEC gene expression during hUTI compared to that during *in vitro* conditions  
120 and mUTI. For each strain, we compared log<sub>2</sub> transcripts per million (TPMs) of every gene  
121 between LB and hUTI, human urine culture and hUTI, and finally mUTI and hUTI. Gene  
122 expression during hUTI and mUTI was most highly correlated with the Pearson correlation  
123 coefficient (*r*) ranging from 0.86 to 0.87 (**Fig. 3**). In contrast, the *in vitro* human urine culture when  
124 compared to hUTI exhibited lower correlation values of 0.73-0.80 (**Fig. 3**), consistent with our  
125 previous report (13). Interestingly, gene expression correlation between LB and hUTI was higher  
126 than the correlation between urine and hUTI (*r* between 0.80-0.88) (**Fig 3**). Our data demonstrate  
127 that murine infection is the most reliable and consistent model to recapitulate the conditions that  
128 are observed during human infection.

129 **Gene expression during infection is distinct from that during urine culture.** We have recently  
130 shown that diverse UPEC strains show a conserved gene expression pattern in human patients with  
131 uncomplicated UTIs (13). Since we saw such strong correlation between gene expression in  
132 patients and in mice for each of the UPEC strains (**Fig 3**), we hypothesized that we would also  
133 observe a conserved pattern of gene expression between different UPEC strains during mUTI. To  
134 address this question, we performed principal component analysis (PCA) on gene expression of  
135 the 3,266 genes present in all three UPEC strains (**Fig. 4A**). We observed four distinct clusters that

136 corresponded to the two *in vitro* growth conditions (LB and filter-sterilized human urine cultures)  
137 and the two infection sites (human patients and mice) all displaying condition-specific gene  
138 expression programs. Samples from patients and mice clustered closer to each other than to *in vitro*  
139 samples, suggesting that there is an infection-specific gene expression pattern conserved between  
140 the two hosts.

141         These observations were confirmed when we examined correlations in gene expression  
142 between different strains (**Fig 4B**). Once again, gene expression during mouse infection showed  
143 the highest correlation with gene expression during human infection for all three strains, with a  
144 median correlation coefficient of 0.84. Surprisingly, gene expression in human urine correlated  
145 less well with patient data compared to gene expression during LB culture (average correlation  
146 coefficient from all LB comparisons of 0.81, while the value for urine was 0.71). We also  
147 demonstrated that growth in rich medium (LB) more closely mimics human infection than growth  
148 in nutrient-poor human urine, in agreement with the previously demonstrated rapid growth of  
149 UPEC in the host (both mouse and human) compared to slow growth in human urine (13-16).

150 **Differentially regulated genes between human and mouse infection suggest nutritional**  
151 **disparities.** Despite the high concordance of hUTI and mUTI gene expression data, we wanted to  
152 determine whether any genes are differentially regulated between human and mouse infection. To  
153 answer this question, we used the R package DEseq2 (17) to find significant differences in gene  
154 expression between the two different infections. Strikingly, only 175 genes, representing 5.4% of  
155 the 3,266 genes analyzed, were differentially regulated (30 upregulated, 145 downregulated) in  
156 human infection compared to the mouse model (**Fig. 5A, Table 1 and 2, Supplemental Table 2**).  
157 The upregulated gene with the highest fold-change difference (4.3) between human and mouse



158 was *cspA*, which encodes an RNA chaperone initially identified as a cold shock protein (18, 19).  
159 However, this protein may have other functions as it is highly expressed during early exponential  
160 phase (20) and during the introduction of fresh nutrient sources (21). In addition, the cell division  
161 gene *ftsB* and the upstream regulator of ribosomal RNA transcription *fis* were upregulated in hUTI  
162 as compared to mUTI.

163 The majority of differentially regulated genes were downregulated in patients compared to  
164 mice, and several of these genes span operons encompassing specific systems (**Table 2** and  
165 **Supplemental Table 2**). For example, during mUTI, we observed: increased expression of citrate  
166 lyase operon *citCDEFGTX*, which is responsible for the conversion of citrate oxaloacetate and  
167 acetate and feeds into the production of acetyl-COA under anaerobic conditions (22); the pathway  
168 for allantoin breakdown (*allABDC*); and ethanolamine utilization (*eutABCDEFGHIJLMNPQST*)  
169 (**Table 2** and **Supplemental Table 2**). In addition, genes encoding transporters for the uptake of  
170 L-arabinose (*araADFGH*), L-ascorbate (*ulaABCDEF*), and allantoin (*ybbW*) were transcribed at  
171 higher levels during mUTI (**Table 2** and **Supplemental Table 2**). Furthermore, several genes  
172 related to anaerobic metabolism or fermentation (*hycBDF* and *frdAB*) were more highly expressed  
173 in mice (**Table 2** and **Supplemental Table 2**). All of these results indicate subtle nutrient  
174 differences between the mouse and human urinary tract.

175 **Infection-specific gene expression.** Additionally, we were interested in identifying genes that  
176 behaved similarly during both human and mouse infection, *i.e.*, genes that were up- or down-  
177 regulated in both mouse and human UTI when compared to either of the *in vitro* conditions (LB  
178 or filter-sterilized human urine). There were 54 downregulated genes in both mouse and human  
179 UTI when compared to LB (**Fig. 5B, Supplemental Table 3**) and there were 67 upregulated genes  
180 during both mUTI and hUTI when compared to LB (**Fig. 5B, Supplemental Table 4**).

181 Interestingly, both chemotaxis (*cheABWYZ*) and flagellar machinery (*flgCFGLM* and *fliS*) were  
182 downregulated during infection, which may be attributed to the fact that the UPEC strains we are  
183 analyzing were isolated from the urine of infected individuals; motility genes tend to be  
184 upregulated when UPEC enters the ureters to ascend to the kidneys (23). In contrast, *nrdEFHI*  
185 genes are upregulated in both mice and humans compared to LB. These genes are ribonucleotide  
186 reductases required for DNA synthesis, and therefore often associated with fast growth, fitting the  
187 previously established paradigm of UPEC's rapid *in vivo* growth rate during human and murine  
188 infection (13-16).

189         There were 82 genes that were downregulated during either mUTI or hUTI when compared  
190 to urine (**Fig. 5C, Supplemental Table 5**). These included branched-chain amino acid  
191 biosynthesis (*ilvCDEM*) and leucine biosynthesis (*leuABCD*) operons, consistent with previous  
192 literature indicating that UPEC scavenges amino acids and peptides during infection. In contrast,  
193 there were 72 genes that were upregulated in humans and mice when compared to urine (**Fig. 5C,**  
194 **Supplemental Table 6**). As previously reported (13), we observed 16 genes associated with  
195 ribosomal subunit production as well as the master regulator *fis*, which activates rRNA  
196 transcription, together reinforcing our observation that bacteria are growing rapidly in the host  
197 (15).

198 **Expression of fitness factors during murine infection is predictive of gene expression during**  
199 **human infection.** Finally, we wanted to determine whether previously identified UPEC virulence  
200 factors that have been studied using *in vivo* mouse models would show comparable levels of  
201 expression during both mouse and human infections. We focused on three major functional groups  
202 of fitness factors: iron acquisition systems, adhesins, and metabolism (**Supplemental Table 7**).  
203 We plotted log<sub>2</sub> TPM of the genes in each functional group, comparing expression between hUTI

204 and LB, hUTI and urine, as well as hUTI and mUTI for each of the UPEC strains (**Fig. 6,**  
205 **Supplemental Fig. 2, Supplemental Fig 3.**)

206 As expected, iron acquisition gene expression is much higher during human infection than  
207 during growth in rich LB medium (**Fig. 6A**). The expression levels are more similar between urine  
208 culture (an iron-poor medium) and human infection, but murine infection provides the most  
209 analogous profile (**Fig. 6A**). The only adherence gene cluster that was highly expressed in any of  
210 the assayed conditions was the *fim* operon, which encodes type 1 fimbriae. Expression of *fim* genes  
211 was higher in patients compared to either of the *in vitro* conditions, but almost perfectly matched  
212 the expression levels observed during mouse infection (**Fig. 6B**).

213 Metabolic genes showed a major difference between human infection and *in vitro* growth.  
214 The converse is also true; aerobic respiration genes, in particular, were expressed at lower levels  
215 in humans than in either *in vitro* condition. Importantly, we also observed that the expression levels  
216 of aerobic respiration genes align concordantly between human and mice (**Fig. 6C**), while  
217 anaerobic respiration gene expression was elevated in mice compared to humans. This observation  
218 corroborates results from **Fig. 5A, Table 2** and **Supplemental Table 2**, where several genes  
219 involved in anaerobic metabolism were expressed at higher levels in mice compared to hUTI.  
220 Overall, we conclude, with only limited exceptions, that the mouse model of UTI not only shows  
221 a strong global correlation of gene expression with hUTI, but also closely reflects the expression  
222 of virulence and fitness genes that are known to contribute to UPEC fitness during human  
223 infection.

224

## 225 **Discussion**

226 UPEC virulence factors as well as potential therapeutic strategies have been studied in  
227 detail using a well-established mouse model of infection that involves transurethral inoculation of  
228 UPEC into the bladder. This mouse model has been extensively used in the field, and the original  
229 papers defining this model (8, 24) have been cited nearly 500 times. Until now, there has been no  
230 direct comparison of global bacterial gene expression between human and mouse studies using the  
231 identical strain, and it is essential to understand how the mouse model relates to human disease.  
232 This study is the first to define the bacterial transcriptome from infected patients and infected mice  
233 using the same UPEC strains, thus presenting a direct comparison between the murine model and  
234 human infection. Our study demonstrates that the UTI mouse model accurately recapitulates the  
235 human disease with respect to the bacterial transcriptional response.

236 We compared three UPEC strains (HM43, HM56, and HM86) that were isolated in 2012  
237 from women with symptoms of cystitis and documented bacteriuria (25). We isolated bacterial  
238 RNA, stabilized immediately, from their urine to conduct RNA-seq and define the core bacterial  
239 transcriptome during acute human infection (13). The same strains were then used for mouse  
240 infection, followed by urine collection, bacterial RNA isolation and sequencing. We consistently  
241 observed an extraordinarily high correlation between the bacterial transcriptome during mouse and  
242 human infection, with the Pearson correlation coefficient ranging from 0.86 to 0.87. This  
243 correlation is not strain-specific, as infections with all three stains showed similar results.  
244 Expression of virulence and metabolic genes was also found to be very similar between human  
245 and mouse infection. This provides strong evidence that the mouse model is an accurate  
246 representation of the infection that occurs in humans.

247           Mounting evidence suggests that UPEC in the human host are rapidly dividing (13, 15).  
248   We have recently shown that this is recapitulated in the mouse model, although to a lesser degree  
249   (13). This difference in growth rate between human and mouse UTIs potentially can be understood  
250   by examining the genes that are differentially expressed between human and mouse infections.  
251   Most of the differentially expressed genes were expressed at a lower level during hUTI compared  
252   to mUTI (145 of 175 genes). Many of these 145 genes are involved in anaerobic metabolism.  
253   Several of them were clustered in operons encoding oxidoreductases involved in fumarate or nitrite  
254   reduction. Additionally, genes involved in nutrient usage under anaerobic conditions were also  
255   expressed at a lower level during hUTI, such as the *all* operon, which encodes the catabolic  
256   pathway for allantoin degradation (a step in purine catabolism (26)), or the *ula* operon, which  
257   encodes both an L-ascorbate transporter and the corresponding enzymes for L-ascorbate  
258   utilization, a compound that can be present in urine due to its water soluble nature (27). Therefore,  
259   we hypothesize that the human bladder is better oxygenated than the mouse bladder, likely due to  
260   a higher surface area to volume ratio. Indeed, a higher oxygen level in human bladders might also  
261   account for the higher levels of replication observed in hUTI (13), since an aerobic lifestyle can  
262   support more rapid growth. There were also differences in transport systems involved in nutrient  
263   acquisition between hUTI and mUTI. Arabinose transport (*araADFGH*) was expressed at a lower  
264   level in humans; this sugar has been shown to be present in human bladders in  $\mu\text{M}$  amounts when  
265   normalized to creatine (27). It is also present in murine bladders (28), but has never been precisely  
266   quantified. It would be interesting if arabinose is present in lower amounts in humans compared  
267   to mice, accounting for this difference in regulation. One of the few genes that was upregulated in  
268   humans compared to mice was *dsdX*, which encodes a D-serine transporter. Interestingly, D-serine  
269   is present in micromolar amounts in human urine (29), D-serine utilization is associated with

270 uropathogenic strains (30, 31) and accumulation of D-serine leads to a “hypervirulent” phenotype  
271 (31, 32) in the urinary tract. Since there was an upregulation in D-serine transport, and not in the  
272 deaminase required for its breakdown (*dsdA*), perhaps this presents a mechanism to increase the  
273 intracellular levels of D-serine specific to hUTI.

274 We also compared the gene expression profiles of UPEC during infection with the two  
275 most common *in vitro* models, LB cultures and pooled filter-sterilized human urine cultures.  
276 Surprisingly, even though urine might seem to be the more physiologically relevant medium for  
277 *in vitro* experimentation, LB overall provided a better model for infection compared to urine  
278 cultures. The lower correlation between hUTI and urine culture gene expression could be due a  
279 nutrient limitation that is not present during infection. The bladder is akin to a chemostat, with  
280 fresh urine constantly being introduced into the organ, a condition that is not recapitulated in our  
281 *in vitro* conditions. Furthermore, the collected urine is typically filter-sterilized and this method  
282 excludes exfoliated bladder epithelial cells, likely another major source of nutrients for the  
283 pathogen during human infection. In future studies, we could add lysed bladder cells from cell  
284 culture to supplement the filter-sterilized urine and determine if this represents a better model of  
285 the nutrient milieu. However, when studying specific systems, such as iron acquisition, urine is a  
286 better model than LB, since it more accurately recapitulates the iron-limited environment of the  
287 host.

288 In summary, while both *in vitro* models have advantages and disadvantages, the mouse  
289 model provides the most holistic representation of infection and provides the best platform to  
290 answer questions that are more difficult or impossible to assess when working with human patients.

291

## 292 **Methods**

293 **Bacterial culture conditions.** Clinical UPEC strains HM43, 56 and 86 (25) were cultured  
294 overnight in LB medium at 37°C with aeration. The next morning, cultures were centrifuged and  
295 the pellets washed twice with PBS, then diluted 1:100 into either fresh LB medium or human urine.  
296 The human urine was collected and pooled from at least four healthy female volunteers and passed  
297 through a 0.22 µm filter for sterilization. Bacteria were cultured at 37°C with aeration to mid-  
298 exponential phase (3 hours), then stabilized in RNAprotect (Qiagen). Bacterial pellets were stored  
299 at -80°C until RNA isolation.

300

301 **Mouse infection.** Forty female CBA/J mice were transurethrally inoculated, using the previously  
302 established ascending model of UTI (8), with 10<sup>8</sup> CFU of either HM43, 56, or 86, and the infection  
303 was allowed to progress for 48 hours. Urine from five mice was collected to enumerate bacterial  
304 burden, while the rest was collected for RNA (see below for method). Mice were sacrificed, and  
305 their bladders and kidneys aseptically removed, homogenized, and plated to determine bacterial  
306 burden. Mouse urine was collected as previously described (13). Briefly, urine was directly  
307 collected into RNAprotect, pooled, pelleted, and stored at -80°C until RNA isolation.

308

309 **RNA isolation and library preparation.** RNA was isolated as previously described (13). Briefly,  
310 all bacterial pellets were treated with both lysozyme and proteinase K, and then total RNA was  
311 extracted using a RNeasy kit (Qiagen). Genomic DNA was removed using the Turbo DNA-free  
312 kit (ThermoFisher). Eukaryotic mRNA was depleted using Dynabeads covalently linked with  
313 oligo dT (ThermoFisher). The *in vitro* samples underwent the same treatment with Dynabeads to  
314 reduce any potential biases this procedure might introduce to the downstream sequencing. The

315 supernatant was collected from this treatment, and RNA was concentrated and re-purified using a  
316 RNA Clean and Concentrator kit (Zymo).

317 To compare the results of the new RNA-sequencing experiment to the published  
318 expression data obtained from the human samples (13), the library preparation method needed to  
319 be identical to avoid batch effects. The original sequencing data were obtained using the ScriptSeq  
320 Complete kit (Bacteria) to prepare the cDNA library. However, at the time of this study, Illumina  
321 had discontinued this kit. As a result, we used ScriptSeq Complete Gold Kit (Epidemiology),  
322 which contains rRNA removal for prokaryotes and eukaryotes for the HM86-mouse sample, the  
323 HM43-mouse, HM43-LB and HM43-urine samples, we had to switch to ScriptSeq Complete  
324 (Bacteria), which contains prokaryotic rRNA removal for HM56-mouse, HM56-LB, HM56-urine,  
325 HM86-LB, and HM86-urine. Mammalian rRNA was then removed from HM56-mouse with  
326 ThermoFisher's mammalian rRNA removal kit (cat #457012).

327

328 **RNA-sequencing.** *E. coli* HM43 was sequenced using an Illumina HiSeq2500 (single end, 50 bp  
329 read length) and *E. coli* HM56 and HM86 were sequenced using the Nextseq-500 with identical  
330 conditions (single end, 50 bp read length).

331

332 **Histology and tissue processing.** Bladders were removed and halved by cutting on the transverse  
333 plane, while kidneys were cut on the sagittal plane. One half of each organ was used to enumerate  
334 CFU, while the other halves were placed into tissue cassettes and immersion-fixed in 10% formalin  
335 for at least 24 hours. They were then embedded in paraffin, cut into thin sections and stained with  
336 hematoxylin and eosin (H&E) by the *In Vivo* Animal Core at the University of Michigan. Tissue  
337 sections were scored as described in Table 7. Briefly, this is a scale of 0-3, where 0 was no



338 inflammation, and 3 was severe inflammation. Each organ section was scored by two different  
 339 people in a blinded manner and the scores averaged together.

340

| <b>Table 3: Scoring criteria for histopathological analysis.</b> |                     |                                                                             |                                                                                            |                                                                           |
|------------------------------------------------------------------|---------------------|-----------------------------------------------------------------------------|--------------------------------------------------------------------------------------------|---------------------------------------------------------------------------|
|                                                                  | <b>Score</b>        |                                                                             |                                                                                            |                                                                           |
| <b>Lesion</b>                                                    | <b>0</b>            | <b>1</b>                                                                    | <b>2</b>                                                                                   | <b>3</b>                                                                  |
| Cystitis                                                         | No scorable lesions | very rare PMNs in stroma or lumen or occasional perivascular lymphoid cuffs | many PMNs and moderate edema                                                               | Many PMNs; widespread, marked edema, transmural inflammation              |
| Pyelonephritis                                                   | No scorable lesions | very occasional PMNs in lumen or peripelvic tissue                          | Rafts of PMNs in the pelvis and/or scattered focal aggregates of PMNs in peripelvic tissue | many PMNs in all sections, or a single large focus of PMNs in one section |

341

342 **RNAseq Data Processing.** A custom bioinformatics pipeline was used for the analysis  
 343 ([github.com/ASintsova/rnaseq\\_analysis](https://github.com/ASintsova/rnaseq_analysis)). Raw fastq files were processed with Trimmomatic (21)  
 344 to remove adapter sequences and analyzed with FastQC to assess sequencing quality. Mapping  
 345 was done with bowtie2 aligner (33) using default parameters. Alignment details can be found in  
 346 Supplemental Table 1. Read counts were calculated using HTseq htseq-count (34).

347

348 **Pearson correlation coefficient calculation and PCA analysis.** For PCA and correlation  
349 analysis, transcript per million (TPM) was calculated for each gene; TPM distribution was then  
350 normalized using  $\log_2$  transformation. Pearson correlation and PCA were performed using Python  
351 sklearn library. Jupyter notebooks used to generate the figures are available at  
352 <https://github.com/ASintsova/HUTI-RNAseq>

353  
354 **Differential expression analysis.** Differential expression analysis was performed using DESeq2  
355 R package (17). Genes with  $\log_2$  fold change of greater than 1 or less than -1 and adjusted  $p$  values  
356 (Benjamini-Hochberg adjustment) of less than 0.05 were considered to be differentially expressed.  
357 Pathway analysis was performed using R package topGO (35).

358  
359 **Data access.** Jupyter notebooks as well as all the data used to generate the figures in this paper are  
360 available on github: <https://github.com/ASintsova/HUTI-RNAseq>

361 **Figures**

Fig.1

| Gene         | HM43    | HM56    | HM86    |
|--------------|---------|---------|---------|
| <i>entB</i>  | Present | Present | Present |
| <i>cirA</i>  | Present | Present | Present |
| <i>fepA</i>  | Present | Present | Present |
| <i>fiu</i>   | Present | Present | Present |
| <i>iha</i>   | Absent  | Absent  | Absent  |
| <i>ireA</i>  | Absent  | Absent  | Absent  |
| <i>iroB</i>  | Absent  | Present | Absent  |
| <i>iroN</i>  | Absent  | Present | Absent  |
| <i>irp1</i>  | Present | Present | Present |
| <i>fyuA</i>  | Present | Present | Present |
| <i>iucC</i>  | Absent  | Absent  | Present |
| <i>fitA</i>  | Present | Present | Present |
| <i>iutA</i>  | Absent  | Absent  | Present |
| <i>fhuA</i>  | Present | Present | Present |
| <i>chuA</i>  | Present | Present | Present |
| <i>hma</i>   | Absent  | Present | Present |
| <i>sitA</i>  | Absent  | Present | Present |
| <i>tonB</i>  | Present | Present | Present |
| <i>cheW</i>  | Present | Present | Present |
| <i>cheY</i>  | Present | Present | Present |
| <i>flgM</i>  | Present | Present | Present |
| <i>motA</i>  | Present | Present | Present |
| <i>motB</i>  | Present | Present | Present |
| <i>csgA</i>  | Present | Present | Present |
| <i>aufA</i>  | Present | Absent  | Present |
| <i>focA</i>  | Absent  | Absent  | Absent  |
| <i>c1936</i> | Present | Present | Present |
| <i>c2395</i> | Absent  | Absent  | Absent  |
| <i>fimH</i>  | Present | Present | Present |
| <i>papG</i>  | Absent  | Present | Absent  |
| <i>pixC</i>  | Absent  | Present | Absent  |
| <i>ppdD</i>  | Absent  | Absent  | Present |
| <i>yadN</i>  | Present | Present | Present |
| <i>yehA</i>  | Present | Present | Present |
| <i>ygiL</i>  | Present | Present | Present |
| <i>yfcV</i>  | Present | Present | Present |
| <i>cnf1</i>  | Absent  | Absent  | Present |
| <i>hlyA</i>  | Absent  | Absent  | Present |
| <i>picU</i>  | Absent  | Absent  | Absent  |
| <i>sat</i>   | Absent  | Absent  | Absent  |
| <i>tosA</i>  | Absent  | Absent  | Absent  |
| <i>vat</i>   | Absent  | Present | Present |

  

|                  |                  |
|------------------|------------------|
| Present          | Present          |
| Absent           | Absent           |
| Iron Acquisition | Iron Acquisition |
| Motility         | Motility         |
| Adhesin          | Adhesin          |
| Toxin            | Toxin            |

363  
364  
365  
366  
367  
368  
369  
370

**Fig. 1 Virulence factors present in select clinical UPEC strains.** Three clinical isolates, HM43, HM56, and HM86, were assessed for the presence of 42 virulence factors commonly associated with UPEC. Presence or absence of these genes was determined via BLAST ( $\geq 80\%$  coverage and  $\geq 90\%$  identity). White indicates absence of gene, while black indicates presence. Color coding on gene names identifies the function of each virulence factor. Goldenrod is iron acquisition, green is motility, blue is adhesins, while red is toxins.

**Fig.2**

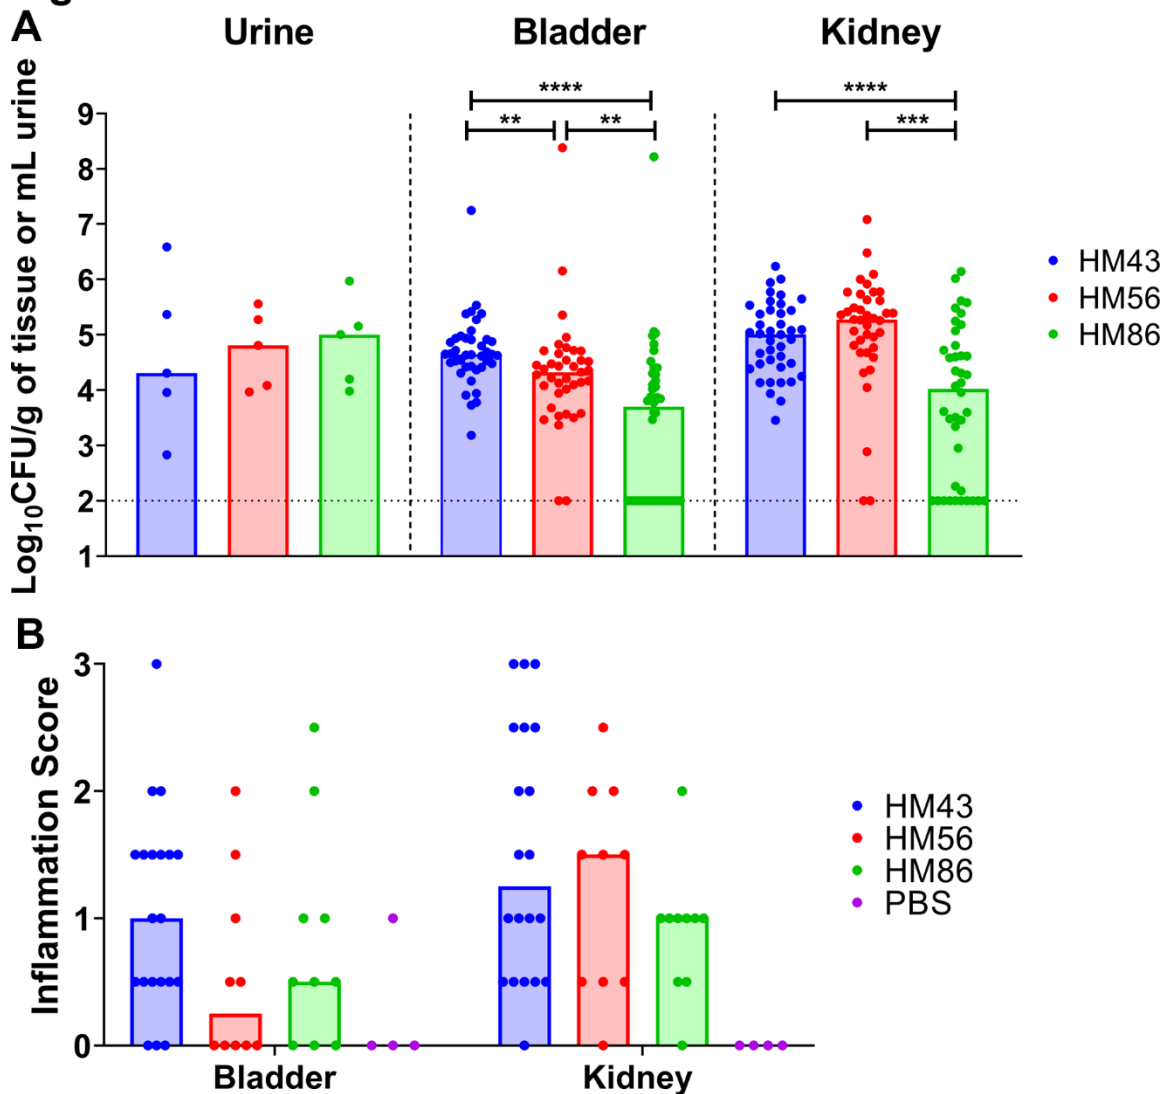

371  
372  
373  
374  
375  
376  
377  
378

**Fig. 2 Murine colonization and inflammatory response of selected clinical UPEC strains.** CBA/J mice were transurethrally inoculated with  $10^8$  CFU of the indicated strain (HM43, HM56 of HM86). (A) Bacterial burden was enumerated from urine, bladder and kidneys 48 hours post infection. Symbols are individual animals and bars represent the median. Dotted line indicates limit of detection. A two-tailed Mann-Whitney test was performed to test significance, \*\*  $P < 0.01$ , \*\*\*  $P < 0.005$  \*\*\*\*  $P < 0.0001$ . (B) Inflammation was assessed using histopathological analysis of stained thin sections of each specified organ. Inflammation was scored on a 0-3 scale, with zero

379 being no inflammation, and 3 being severe. Mice were mocked-infected with PBS to serve as a  
380 negative control. Symbols are individual animals and bars represent the median.  
381

Fig. 3

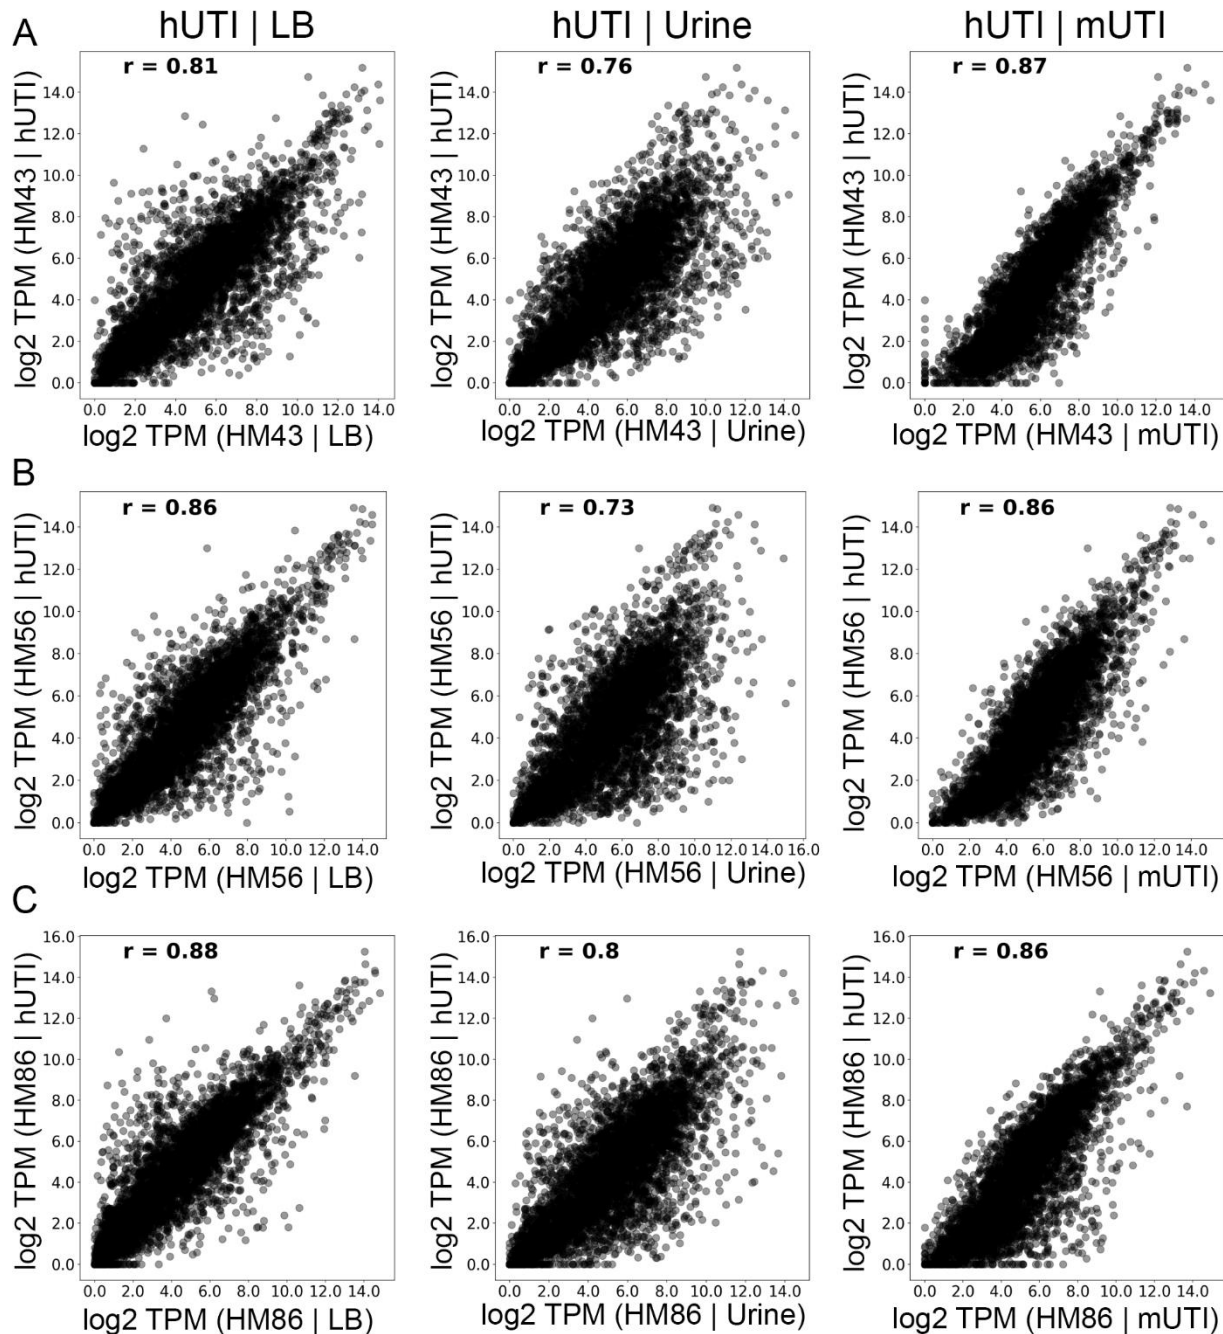

382  
383

384 **Fig. 3. UPEC gene expression during mouse and human infections is highly correlated.** Gene  
385 expression ( $\log_2$  TPM) for three UPEC strains: HM43 (A), HM56 (B), and HM86 (C) was  
386 compared between LB culture and human infection (hUTI vs LB); urine culture and human  
387 infection (hUTI vs urine); and mouse infection and human infection (hUTI vs mUTI). Pearson  
388 correlation coefficient ( $r$ ) is shown in top left corner of each plot.

389

Fig. 4

A

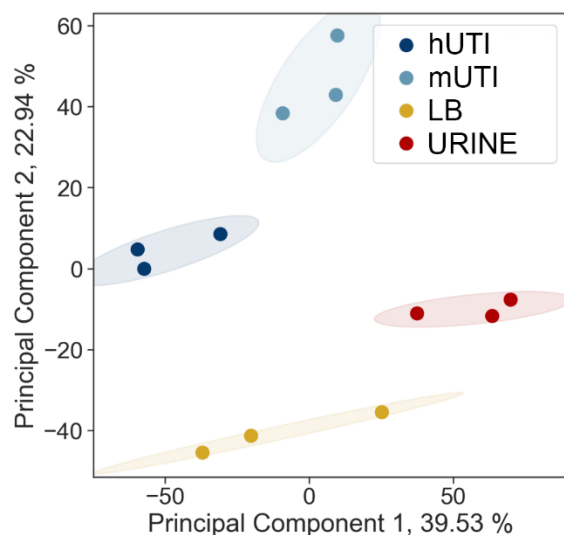

B

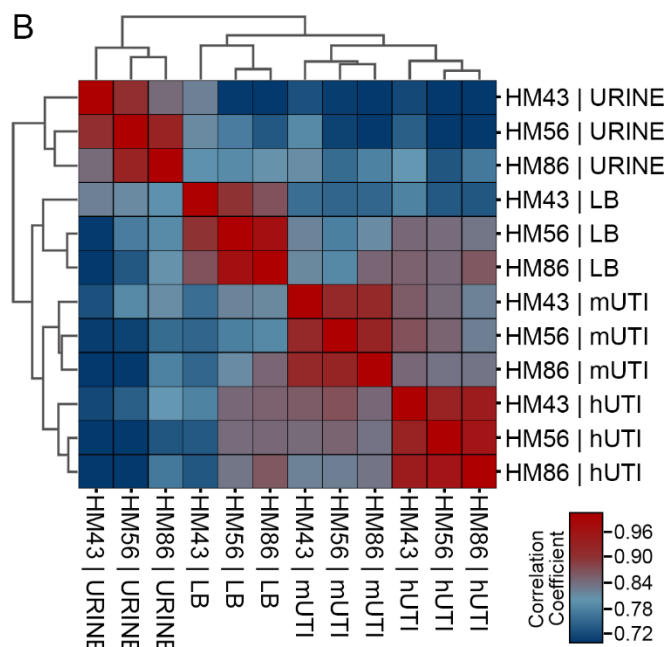

390

391

392 **Fig. 4. Host-associated gene expression is distinct from that of *in vitro* culture.** (A) Principal  
393 component analysis of normalized gene expression of 3 clinical UPEC strains during human  
394 infection (hUTI), during mouse infection (mUTI), during *in vitro* LB culture (LB), and *in vitro*  
395 urine cultures (URINE). (B) Correlations among *in vitro* and patient samples measured by Pearson  
396 correlation coefficient of normalized gene expression for genes present in all 3 strains (n=3266)  
plotted according to hierarchical clustering of samples.

Fig. 5

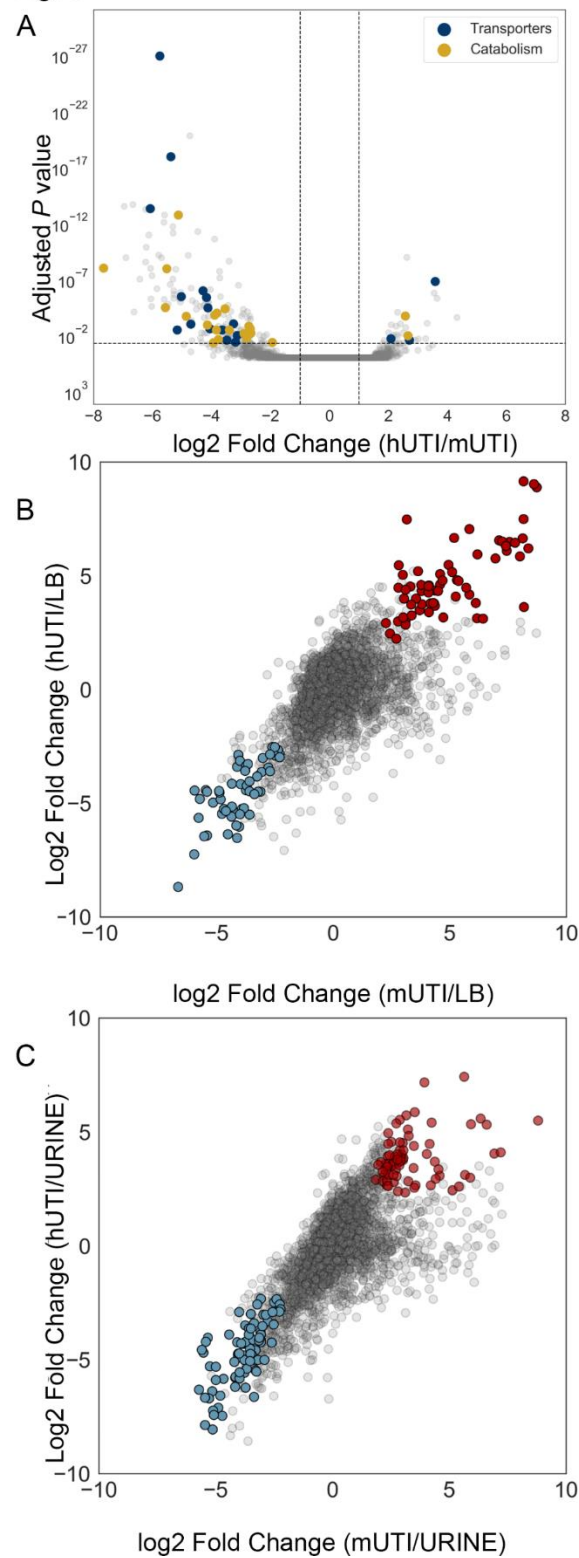

397  
398  
399  
400  
401

**Figure 5. Differential expression analysis reveals infection-specific gene expression responses.** (A) The DESeq2 R package was used to compare UPEC gene expression during mUTI to that in patients. Each UPEC strain was considered an independent replicate ( $n = 3$ ). Genes were considered up-regulated (down-regulated) if log<sub>2</sub> fold change in expression was higher

402 (lower) than 1 (vertical lines), and  $P$  value  $< 0.05$  (horizontal line). Using these cutoffs, we  
403 identified 30 upregulated genes and 145 downregulated genes in patients. GO/pathway analysis  
404 showed a number of transporters and catabolic enzymes among differentially expressed genes  
405 (individually labeled). (B and C) Identification of genes differentially expressed during infection  
406 (hUTI or mUTI) compared to LB (B) or urine (C). Genes were considered to be up/downregulated  
407 in both mouse and human if  $\log_2$  fold change was higher/lower than 1, and  $P$  value  $< 0.05$  in both  
408 cases. Genes that were upregulated during infection when compared to LB (B) or urine (C) are  
409 shown in red, genes that were downregulated during infection compared to LB are shown in blue.  
410

Fig. 6

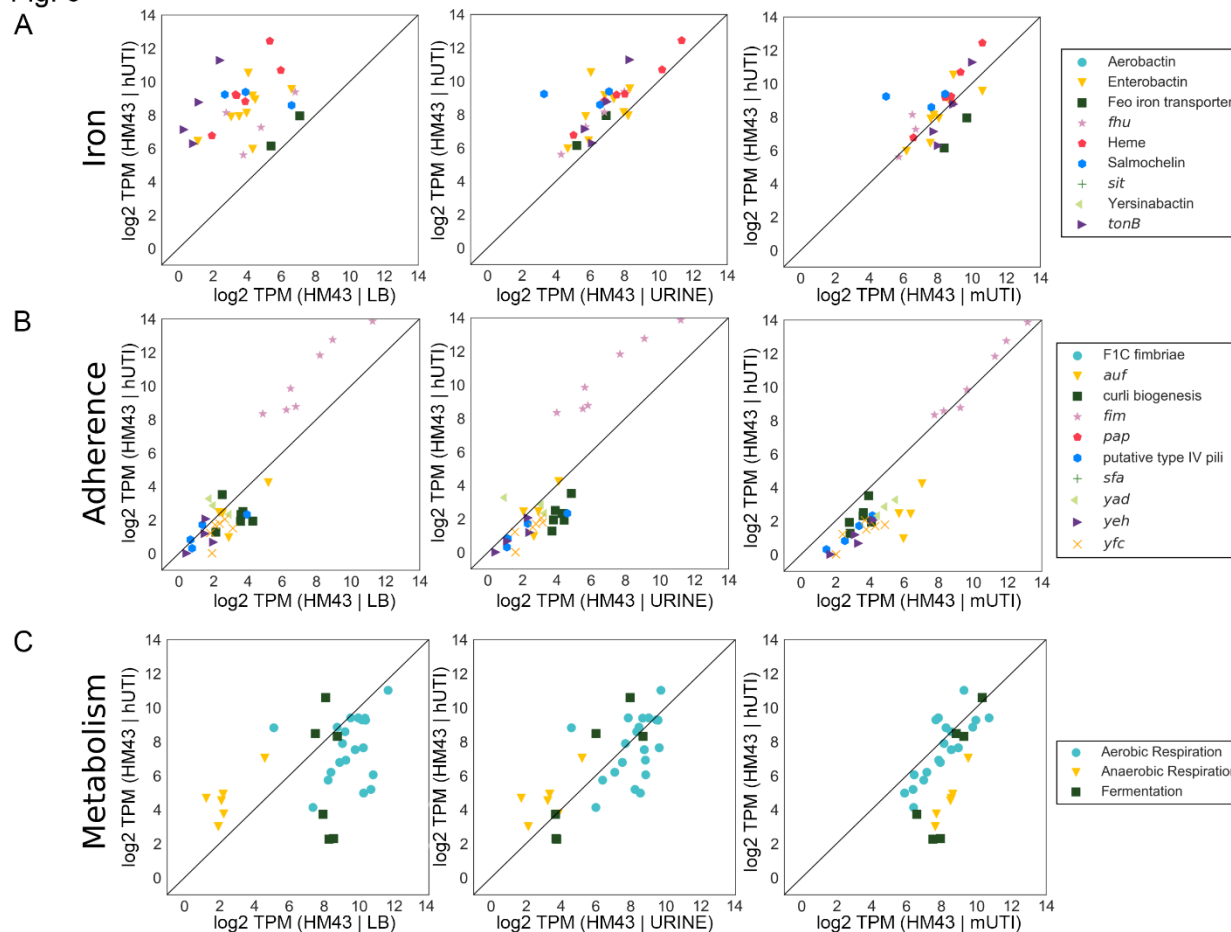

411  
412 **Figure 6. Gene expression of virulence factors as well as metabolic machinery is highly**  
413 **consistent between mouse model of UTI and human UTI.** Gene expression of iron acquisition  
414 operons (A), adherence genes (B), and metabolic pathways (C) for HM43 was compared  
415 between LB and human infection (LB vs hUTI), urine and human infection (urine vs hUTI), and  
416 mouse UTI and human UTI (mUTI vs hUTI).  
417



**Table 1: Genes differentially upregulated in human patients compared to mice<sup>a</sup>**

| Gene        | Annotation                                                                      | log <sub>2</sub> FC | Locus Tag   |
|-------------|---------------------------------------------------------------------------------|---------------------|-------------|
| <i>ahpC</i> | alkyl hydroperoxide reductase, AhpC component                                   | 2.6                 | b0605       |
| <i>cspA</i> | cold shock protein CspA                                                         | 4.3                 | b3556       |
| <i>dsdX</i> | D-serine transporter                                                            | 2.7                 | b2365       |
| <i>fis</i>  | DNA-binding transcriptional dual regulator Fis                                  | 2.4                 | b3261       |
| <i>ftsB</i> | cell division protein FtsB                                                      | 2.3                 | b2748       |
| <i>gntK</i> | D-gluconate kinase, thermostable                                                | 2.7                 | b3437       |
| <i>gpt</i>  | xanthine-guanine phosphoribosyltransferase                                      | 2.4                 | b0238       |
| <i>gspH</i> | hypothetical type II secretion protein GspH                                     | 3.0                 | UTI89_C3381 |
| <i>gspL</i> | hypothetical type II secretion protein GspL                                     | 3.3                 | UTI89_C3377 |
| <i>hpt</i>  | hypoxanthine phosphoribosyltransferase                                          | 2.1                 | b0125       |
| <i>ibaG</i> | acid stress protein IbaG                                                        | 2.2                 | b3190       |
| <i>lysP</i> | lysine:H(+) symporter                                                           | 2.1                 | b2156       |
| <i>opgC</i> | protein required for succinyl modification of osmoregulated periplasmic glucans | 2.6                 | b1047       |
| <i>ribE</i> | 6,7-dimethyl-8-ribityllumazine synthase                                         | 2.1                 | b0415       |
| <i>rpmE</i> | 50S ribosomal subunit protein L31                                               | 2.7                 | b3936       |
| <i>suhB</i> | inositol-phosphate phosphatase                                                  | 2.6                 | b2533       |
| <i>yajG</i> | putative lipoprotein YajG                                                       | 2.6                 | b0434       |
| <i>yceA</i> | UPF0176 protein YceA                                                            | 3.5                 | b1055       |
| <i>yciB</i> | inner membrane protein                                                          | 2.3                 | b1254       |
| <i>ydiE</i> | PF10636 family protein YdiE                                                     | 2.1                 | b1705       |
| <i>yecJ</i> | DUF2766 domain-containing protein YecJ                                          | 2.5                 | b4537       |
| <i>yejL</i> | DUF1414 domain-containing protein YejL                                          | 2.2                 | b2187       |
| <i>yfaZ</i> | putative porin YfaZ                                                             | 2.9                 | b2250       |
| <i>yfhL</i> | putative 4Fe-4S cluster-containing protein YfhL                                 | 2.6                 | b2562       |
| <i>yghD</i> | putative type II secretion system M-type protein                                | 3.6                 | b2968       |
| <i>yghG</i> | lipoprotein YghG                                                                | 3.3                 | b2971       |
| <i>yifK</i> | putative transporter YifK                                                       | 3.6                 | b3795       |
| <i>yqcC</i> | DUF446 domain-containing protein YqcC                                           | 2.5                 | b2792       |
| <i>yqgF</i> | ribonuclease H-like domain containing nuclease                                  | 2.3                 | b2949       |
| <i>yqiA</i> | esterase YqiA                                                                   | 2.3                 | b3031       |

<sup>a</sup> FC: Fold Change

**Table 2: Top 30 genes differentially downregulated in human patients compared to mice<sup>a</sup>**

| Gene        | Annotation                                                             | log <sub>2</sub> FC | Locus Tag |
|-------------|------------------------------------------------------------------------|---------------------|-----------|
| <i>allB</i> | allantoinase                                                           | -7.0                | b0512     |
| <i>allD</i> | ureidoglycolate dehydrogenase                                          | -6.0                | b0517     |
| <i>araA</i> | L-arabinose isomerase                                                  | -5.6                | b0062     |
| <i>citC</i> | citrate lyase synthetase                                               | -6.2                | b0618     |
| <i>citD</i> | citrate lyase acyl carrier protein                                     | -5.6                | b0617     |
| <i>citG</i> | triphosphoribosyl-dephospho-CoA synthase                               | -5.5                | b0613     |
| <i>citX</i> | apo-citrate lyase phosphoribosyl-dephospho-CoA transferase             | -5.9                | b0614     |
| <i>eutG</i> | putative alcohol dehydrogenase in ethanolamine utilization             | -5.7                | b2453     |
| <i>eutM</i> | putative structural protein, ethanolamine utilization microcompartment | -6.1                | b2457     |
| <i>eutN</i> | putative carboxysome structural protein                                | -6.6                | b2456     |
| <i>fdrA</i> | putative acyl-CoA synthetase FdrA                                      | -6.2                | b0518     |
| <i>frdA</i> | fumarate reductase flavoprotein subunit                                | -5.6                | b4154     |
| <i>frdB</i> | fumarate reductase iron-sulfur protein                                 | -5.3                | b4153     |
| <i>frdC</i> | fumarate reductase membrane protein FrdC                               | -6.1                | b4152     |
| <i>glxR</i> | tartronate semialdehyde reductase 2                                    | -7.7                | b0509     |
| <i>hycA</i> | regulator of the transcriptional regulator FhIA                        | -5.3                | b2725     |
| <i>hycB</i> | formate hydrogenlyase subunit HycB                                     | -6.0                | b2724     |
| <i>ompW</i> | outer membrane protein W                                               | -6.4                | b1256     |
| <i>ssnA</i> | putative aminohydrolase                                                | -5.3                | b2879     |
| <i>tdcA</i> | DNA-binding transcriptional activator TdcA                             | -6.2                | b3118     |
| <i>tdcB</i> | catabolic threonine dehydratase                                        | -5.5                | b3117     |
| <i>ulaA</i> | L-ascorbate specific PTS enzyme IIC component                          | -6.1                | b4193     |
| <i>ulaB</i> | L-ascorbate specific PTS enzyme IIB component                          | -5.8                | b4194     |
| <i>ulaC</i> | L-ascorbate specific PTS enzyme IIA component                          | -5.4                | b4195     |
| <i>ybbW</i> | putative allantoin transporter                                         | -6.7                | b0511     |
| <i>ygeW</i> | putative carbamoyltransferase YgeW                                     | -6.9                | b2870     |
| <i>ygeY</i> | putative peptidase YgeY                                                | -6.1                | b2872     |
| <i>ygfK</i> | putative oxidoreductase, Fe-S subunit                                  | -5.8                | b2878     |
| <i>yhjX</i> | putative pyruvate transporter                                          | -5.4                | b3547     |
| <i>ylbE</i> | DUF1116 domain-containing protein YlbE                                 | -5.6                | b4572     |

<sup>a</sup> FC: Fold Change, N/A: not available

419

## 420 References

- 421 1. Flores-Mireles AL, Walker JN, Caparon M, Hultgren SJ. 2015. Urinary tract infections:  
422 epidemiology, mechanisms of infection and treatment options. *Nature Reviews*  
423 *Microbiology* 13:269-284.
- 424 2. Foxman B. 1990. Recurring urinary tract infection: incidence and risk factors. *Am J*  
425 *Public Health* 80:331-3.
- 426 3. Foxman B. 2010. The epidemiology of urinary tract infection. *Nature reviews Urology*  
427 7:653-660.

- 428 4. Terlizzi ME, Gribaudo G, Maffei ME. 2017. Uropathogenic *Escherichia coli* (UPEC)  
429 Infections: Virulence Factors, Bladder Responses, Antibiotic, and Non-antibiotic  
430 Antimicrobial Strategies. *Frontiers in Microbiology* 8:1566.
- 431 5. Subashchandrabose S, Mobley HLT. 2015. Virulence and Fitness Determinants of  
432 Uropathogenic *Escherichia coli*. *Microbiology Spectrum* 3.
- 433 6. Sivick KE, Mobley HLT. 2010. Waging war against uropathogenic *Escherichia coli*:  
434 winning back the urinary tract. *Infection and Immunity* 78:568-585.
- 435 7. Alteri CJ, Mobley HLT. 2015. Metabolism and Fitness of Urinary Tract Pathogens.  
436 *Microbiology Spectrum* 3.
- 437 8. Hagberg L, Engberg I, Freter R, Lam J, Olling S, Svanborg Edén C. 1983. Ascending,  
438 unobstructed urinary tract infection in mice caused by pyelonephritogenic *Escherichia*  
439 *coli* of human origin. *Infection and Immunity* 40:273-283.
- 440 9. Seok J, Warren HS, Cuenca AG, Mindrinos MN, Baker HV, Xu W, Richards DR,  
441 McDonald-Smith GP, Gao H, Hennessy L, Finnerty CC, López CM, Honari S, Moore  
442 EE, Minei JP, Cuschieri J, Bankey PE, Johnson JL, Sperry J, Nathens AB, Billiar TR,  
443 West MA, Jeschke MG, Klein MB, Gamelli RL, Gibran NS, Brownstein BH, Miller-  
444 Graziano C, Calvano SE, Mason PH, Cobb JP, Rahme LG, Lowry SF, Maier RV,  
445 Moldawer LL, Herndon DN, Davis RW, Xiao W, Tompkins RG, Inflammation, Host  
446 Response to Injury LSCRP. 2013. Genomic responses in mouse models poorly mimic  
447 human inflammatory diseases. *Proceedings of the National Academy of Sciences of the*  
448 *United States of America* 110:3507-3512.
- 449 10. O'Brien VP, Hannan TJ, Nielsen HV, Hultgren SJ. 2016. Drug and Vaccine Development  
450 for the Treatment and Prevention of Urinary Tract Infections. *Microbiology Spectrum* 4.
- 451 11. Snyder JA, Haugen BJ, Buckles EL, Lockatell CV, Johnson DE, Donnenberg MS, Welch  
452 RA, Mobley HLT. 2004. Transcriptome of uropathogenic *Escherichia coli* during urinary  
453 tract infection. *Infection and Immunity* 72:6373-6381.
- 454 12. Hagan EC, Lloyd AL, Rasko DA, Faerber GJ, Mobley HLT. 2010. *Escherichia coli*  
455 global gene expression in urine from women with urinary tract infection. *PLoS pathogens*  
456 6:e1001187.
- 457 13. Sintsova A, Frick-Cheng AE, Smith S, Pirani A, Subashchandrabose S, Snitkin ES,  
458 Mobley H. 2019. Genetically diverse uropathogenic *Escherichia coli* adopt a common  
459 transcriptional program in patients with UTIs. *eLife* 8.
- 460 14. Bielecki P, Muthukumarasamy U, Eckweiler D, Bielecka A, Pohl S, Schanz A, Niemeyer  
461 U, Oumeraci T, von Neuhoff N, Ghigo J-M, Häussler S. 2014. *In vivo* mRNA profiling of  
462 uropathogenic *Escherichia coli* from diverse phylogroups reveals common and group-  
463 specific gene expression profiles. *mBio* 5:e01075-01014.
- 464 15. Forsyth VS, Armbruster CE, Smith SN, Pirani A, Springman AC, Walters MS,  
465 Nielubowicz GR, Himpsl SD, Snitkin ES, Mobley HLT. 2018. Rapid Growth of  
466 Uropathogenic *Escherichia coli* during Human Urinary Tract Infection. *mBio* 9.
- 467 16. Burnham P, Dadhania D, Heyang M, Chen F, Westblade LF, Suthanthiran M, Lee JR, De  
468 Vlaminck I. 2018. Urinary cell-free DNA is a versatile analyte for monitoring infections  
469 of the urinary tract. *Nature Communications* 9:2412.
- 470 17. Love MI, Huber W, Anders S. 2014. Moderated estimation of fold change and dispersion  
471 for RNA-seq data with DESeq2. *Genome Biology* 15:550.
- 472 18. Jones PG, VanBogelen RA, Neidhardt FC. 1987. Induction of proteins in response to low  
473 temperature in *Escherichia coli*. *Journal of bacteriology* 169:2092-2095.

- 474 19. Goldstein J, Pollitt NS, Inouye M. 1990. Major cold shock protein of *Escherichia coli*.  
475 Proceedings of the National Academy of Sciences 87:283-287.
- 476 20. Brandi A, Pon CL. 2012. Expression of *Escherichia coli cspA* during early exponential  
477 growth at 37 °C. Gene 492:382-388.
- 478 21. Yamanaka K, Inouye M. 2001. Induction of CspA, an *E. coli* major cold-shock protein,  
479 upon nutritional upshift at 37 degrees C. Genes to cells : devoted to molecular & cellular  
480 mechanisms 6:279-290.
- 481 22. Pos KM, Dimroth P, Bott M. 1998. The *Escherichia coli* Citrate Carrier CitT: a Member  
482 of a Novel Eubacterial Transporter Family Related to the 2-Oxoglutarate/Malate  
483 Translocator from Spinach Chloroplasts. Journal of Bacteriology 180:4160-4165.
- 484 23. Lane MC, Alteri CJ, Smith SN, Mobley HLT. 2007. Expression of flagella is coincident  
485 with uropathogenic *Escherichia coli* ascension to the upper urinary tract. Proceedings of  
486 the National Academy of Sciences 104:16669-16674.
- 487 24. Hagberg L, Hull R, Hull S, Falkow S, Freter R, Svanborg Edén C. 1983. Contribution of  
488 adhesion to bacterial persistence in the mouse urinary tract. Infection and immunity  
489 40:265-272.
- 490 25. Subashchandrabose S, Hazen TH, Brumbaugh AR, Himpsl SD, Smith SN, Ernst RD,  
491 Rasko DA, Mobley HLT. 2014. Host-specific induction of *Escherichia coli* fitness genes  
492 during human urinary tract infection. Proceedings of the National Academy of Sciences  
493 of the United States of America 111:18327-18332.
- 494 26. Xi H, Schneider BL, Reitzer L. 2000. Purine catabolism in *Escherichia coli* and function  
495 of xanthine dehydrogenase in purine salvage. Journal of Bacteriology 182:5332-5341.
- 496 27. Bouatra S, Aziat F, Mandal R, Guo AC, Wilson MR, Knox C, Bjorndahl TC,  
497 Krishnamurthy R, Saleem F, Liu P, Dame ZT, Poelzer J, Huynh J, Yallou FS, Psychogios  
498 N, Dong E, Bogumil R, Roehring C, Wishart DS. 2013. The human urine metabolome.  
499 PloS One 8:e73076.
- 500 28. Justice SS, Lauer SR, Hultgren SJ, Hunstad DA. 2006. Maturation of intracellular  
501 *Escherichia coli* communities requires SurA. Infection and Immunity 74:4793-4800.
- 502 29. Brückner H, Haasmann S, Friedrich A. 1994. Quantification of D-amino acids in human  
503 urine using GC-MS and HPLC. Amino Acids 6:205-211.
- 504 30. Korte-Berwanger M, Sakinc T, Kline K, Nielsen HV, Hultgren S, Gattermann SG. 2013.  
505 Significance of the D-serine-deaminase and D-serine metabolism of *Staphylococcus*  
506 *saprophyticus* for virulence. Infection and immunity 81:4525-4533.
- 507 31. Schaeffer AJ. 2004. Uropathogenic *Escherichia coli* use d-Serine Deaminase to Modulate  
508 Infection of the Murine Urinary Tract. Journal of Urology 172:1571-1571.
- 509 32. Anfora AT, Haugen BJ, Roesch P, Redford P, Welch RA. 2007. Roles of serine  
510 accumulation and catabolism in the colonization of the murine urinary tract by  
511 *Escherichia coli* CFT073. Infection and immunity 75:5298-5304.
- 512 33. Langmead B, Salzberg SL. 2012. Fast gapped-read alignment with Bowtie 2. Nature  
513 Methods 9:357.
- 514 34. Anders S, Pyl PT, Huber W. 2015. HTSeq--a Python framework to work with high-  
515 throughput sequencing data. Bioinformatics (Oxford, England) 31:166-169.
- 516 35. Alexa A, Rahnenfuhrer J. 2018. topGO: Enrichment Analysis for Gene Ontology. R  
517 package version 2.34.0.
- 518
